# Supplementary material
Source: PubMed Central journal article supplement (PMC5369718)
Supplement: flgastro-2013-100323-s1.pdf [file flgastro-2013-100323-s1.pdf]

|                             | never                 | 1-25%                 | 26-50%                | 51-75%                | 76-99%                | always                |
|-----------------------------|-----------------------|-----------------------|-----------------------|-----------------------|-----------------------|-----------------------|
| female gender               | <input type="radio"/> |
| young age (< 60 years)      | <input type="radio"/> |
| trainee involvement in case | <input type="radio"/> |

**7. What is the diameter of the prophylactic pancreatic stents you use? (More than 1 answer possible)**

- 3F     
 4F     
 5F     
 6F     
 7F

Other (please specify)

**8. What length are the prophylactic pancreatic stents you use? (More than 1 answer possible)**

- 3 cm     
 4 cm     
 5 cm     
 6 cm     
 7 cm     
 8 cm

Other (please specify)

**9. What type of prophylactic pancreatic stents do you use? (More than 1 answer possible)**

- unflanged straight stent     
 single-flanged straight stent     
 unflanged pigtail stent     
 single-flanged pigtail stent

Other (please specify)

**10. How do you follow up pancreatic stent passage?**

- A single Abdominal radiograph followed by Endoscopy for stent retrieval if still in situ  
 Serial abdominal radiographs followed by Endoscopy for stent retrieval if still in situ  
 Endoscopy to remove stent without prior radiograph  
 Not at all  
 Other (please specify)

**11. If you obtain radiographs to check for stent passage after how many days do obtain your last abdominal x-ray before attempting stent retrieval?**

- 1 day     
 2-4 days     
 5-7 days     
 8-10 days     
 11-14 days     
 15-21 days     
 > 21 days

**12. If you perform Endoscopy without prior Abdominal X-Ray after how many days do you attempt stent retrieval?**

- 1 day     
 2-4 days     
 5-7 days     
 8-10 days     
 11-14 days     
 15-21 days     
 > 21 days

**13. If you perform ERCP's but do not insert pancreatic stents please state reason/s (more than 1 option possible)**

- insufficient experience in placing pancreatic stents  
 concern about increased risk of post-ercp pancreatitis in case of failed stent insertion  
 not convinced of its protective benefits in the prevention of post-ercp pancreatitis

- difficulties in following up patients to ensure spontaneous stent passage
- pancreatic stents not available in your hospital

Other (please specify)

**14. Do you use the below pharmacological measures for the prevention of Post-ERCP pancreatitis?**

|                 | Yes                   | No                    |
|-----------------|-----------------------|-----------------------|
| NSAIDs          | <input type="radio"/> | <input type="radio"/> |
| Octreotide      | <input type="radio"/> | <input type="radio"/> |
| Antibiotics     | <input type="radio"/> | <input type="radio"/> |
| Rapid IV Fluids | <input type="radio"/> | <input type="radio"/> |

**15. Do you routinely measure serum amylase/lipase levels post-ERCP in day case patients?**

- Yes
- No
